# Supplementary material for: Improvement of near-surface wind speed modeling through refined aerodynamic roughness length in built-up regions: implementation and validation in the Weather Research and Forecasting (WRF) model version 4.0
Source: Copernicus journal article supplement (doi:10.5194/egusphere-2025-1513), 2025-04-23
Supplement: Supplementary file 1 [file egusphere-2025-1513-supplement.pdf]

*Supplement of*

**Improvement of near-surface wind speed modeling through refined aerodynamic roughness length in built-up regions: implementation and validation in the Weather Research and Forecasting (WRF) model version**

5 **4.0**

Jiamin Wang, Kun Yang, Jiarui Liu, Xu Zhou, Xiaogang Ma, Wenjun Tang, Ling Yuan, Zuhuan Ren

*Correspondence to:* Kun Yang (yangk@tsinghua.edu.cn)

## 10 S1. The settings of $z_{0\_Peng}$ in the WRF model

Before conducting the simulation of wind speed in the WRF model with the gridded  $z_{0\_Peng}$ , we had adjusted the roughness length over vegetated fraction ( $z_{0\_veg}$ ) in each grid from  $z_{0\_Peng}$ . Then, the default  $z_0$  values in WRF over vegetated fraction were replaced with  $z_{0\_veg}$ .

- 15 The mean shear stress ( $\tau = \rho u_*^2$ ) in a grid is the sum of the shear stress over the bare and the vegetated areas weighted by vegetation fraction ( $FVEG$ ):

$$u_{*mean}^2 = u_{*bare}^2 * (1 - FVEG) + u_{*veg}^2 * FVEG \quad (1)$$

- where  $u_{*mean}$  is the mean friction velocity (m/s) derived with  $z_{0\_Peng}$ ;  $u_{*veg}$  and  $u_{*bare}$  are the friction velocity in the vegetated and the bare fraction, which are derived  
20 with  $z_{0\_veg}$  and the roughness length over the bare fraction ( $z_{0\_bare}$ ).

Under neutral conditions,  $z_{0\_veg}$  can be expressed as:

$$z_{0\_veg} = e^{\frac{\ln(z_{ref}) - \left[ \left( \ln\left(\frac{z_{ref}}{z_{0\_Peng}}\right) \right)^{-2} - (1-FVEG) * \left( \ln\left(\frac{z_{ref}}{z_{0\_bare}}\right) \right)^{-2} \right] * \frac{1}{FVEG}}}{2}} \quad (2)$$

where  $z_{ref}$  is the reference height (m), and  $z_{0\_bare}$  and  $FVEG$  can be obtained from WRF model.

25

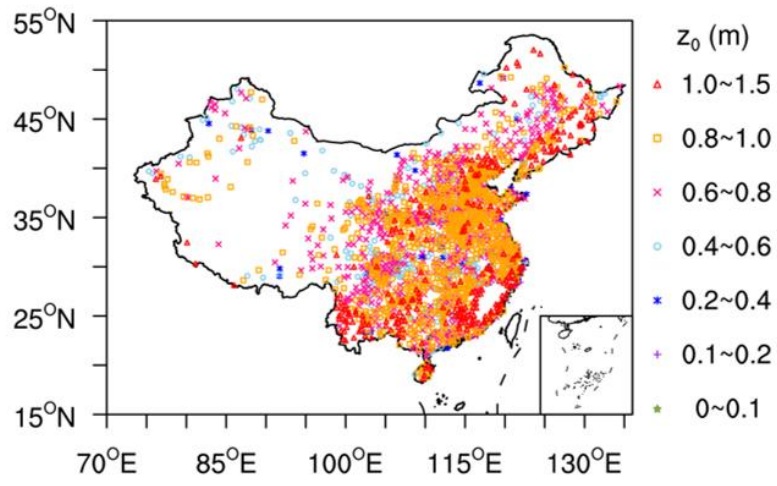

**Figure S1.** Spatial distributions of annual mean  $z_{0\_optimal}$  across 2,162 CMA stations.

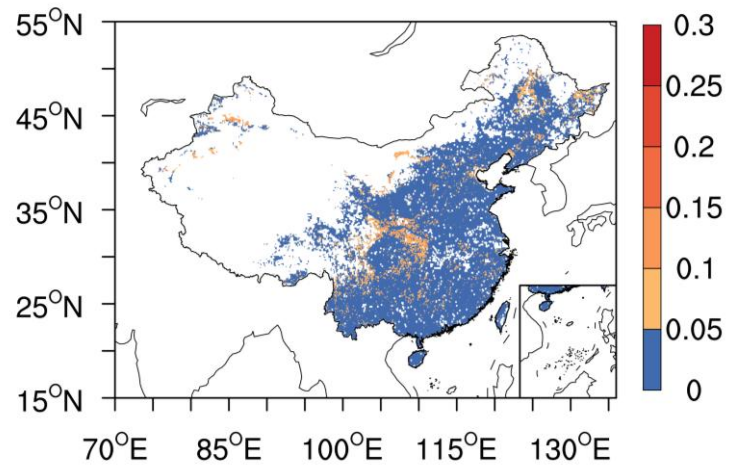

30

**Figure S2.** Spatial distributions of the standard deviation of monthly  $\ln Z_{0\_RFR}$ .

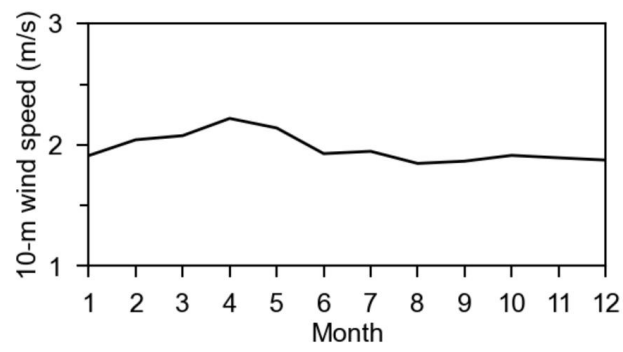

**Figure S3.** Monthly variations of the 10-m wind speed averaged over the d02 domain during 2015-2019 from ERA5.

35

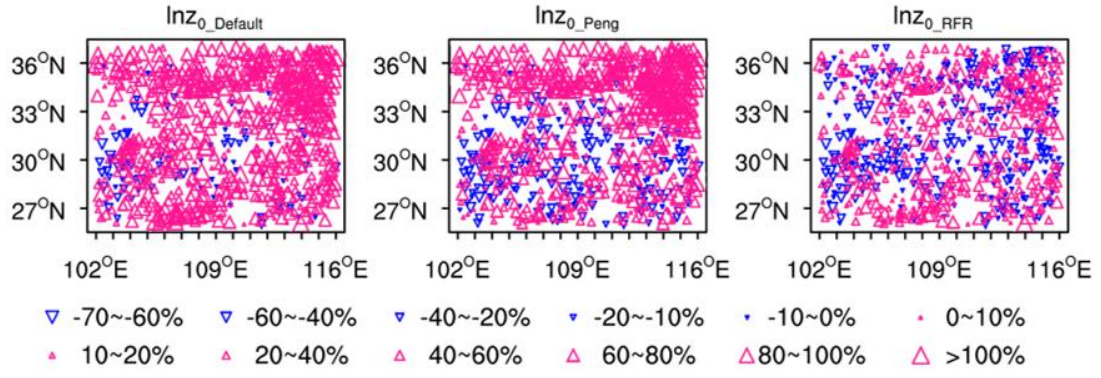

**Figure S4.** Distributions of mean bias percentage (*MBP*) in 10-m wind speed from simulations using  $z_{0\_Default}$ ,  $z_{0\_Peng}$  and  $z_{0\_RFR}$  against observations from CMA stations, calculated as  $[u_{simulations} - u_{CMA}]/u_{CMA} \times 100\%$ .
